# Supplementary figures and images for: Human CD29+/CD56+ myogenic progenitors display tenogenic differentiation potential and facilitate tendon regeneration
Source: eLife journal article supplement (doi:10.7554/elife.98636), 2024-08-12

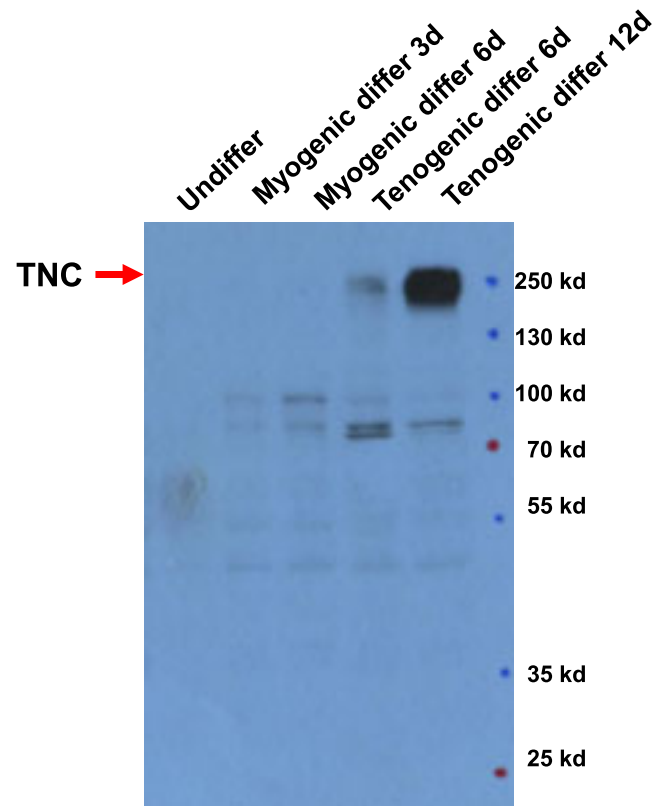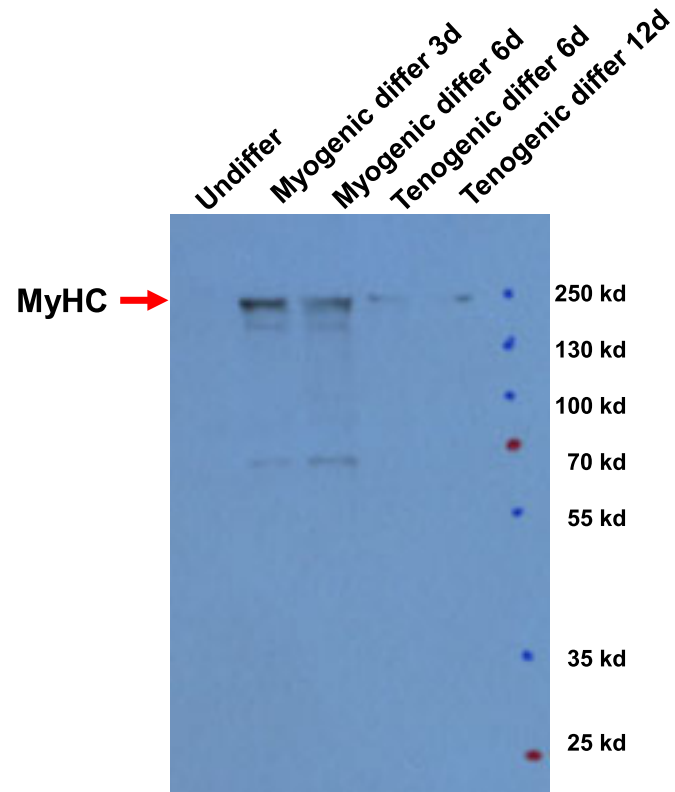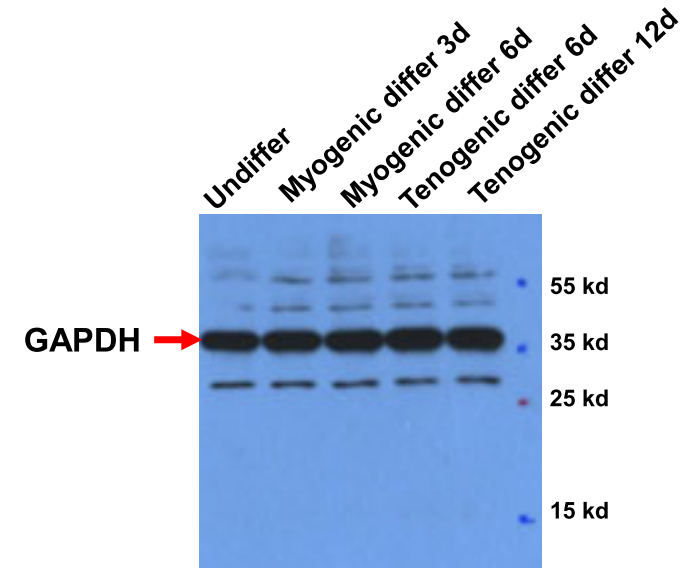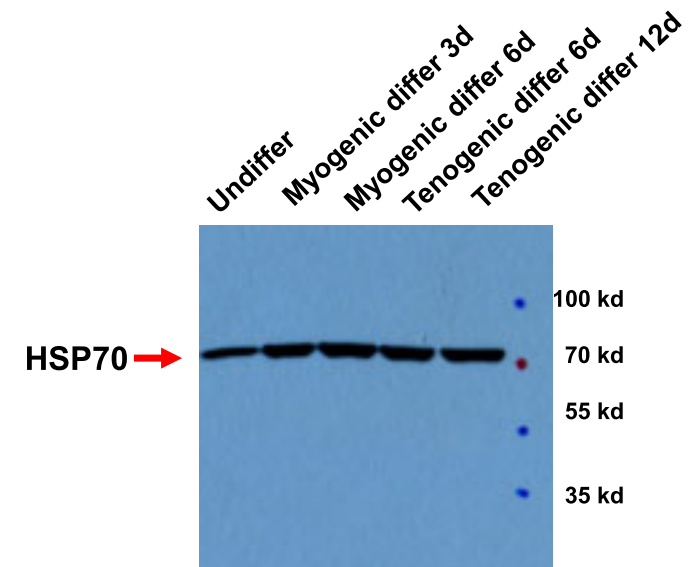

Supplement: fig2-figsupp1-data1 [file elife-98636-fig2-figsupp1-data1-v1.zip]

TNC

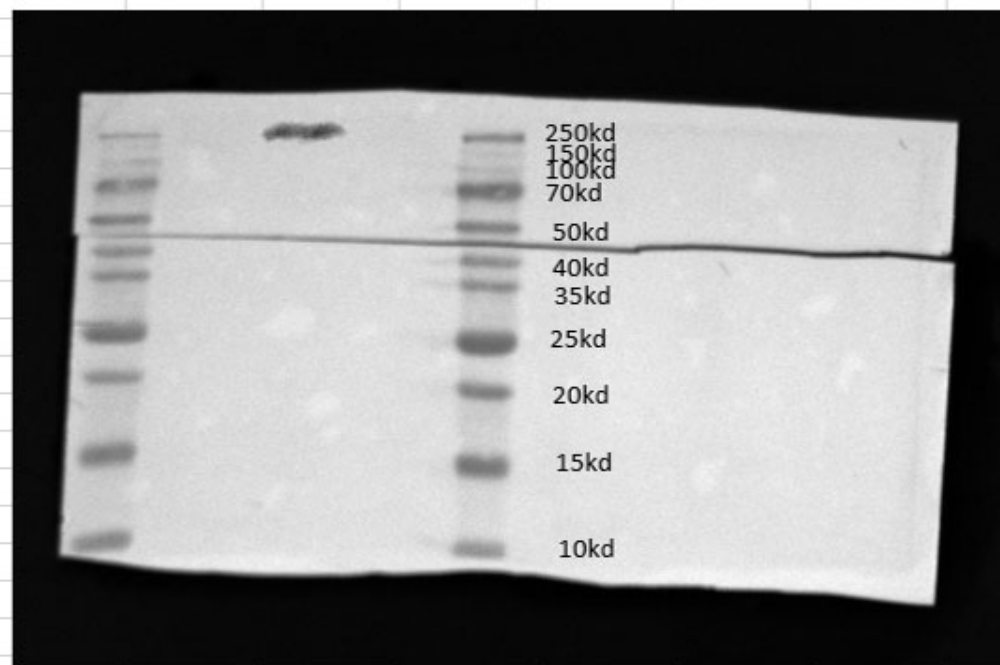

GAPDH

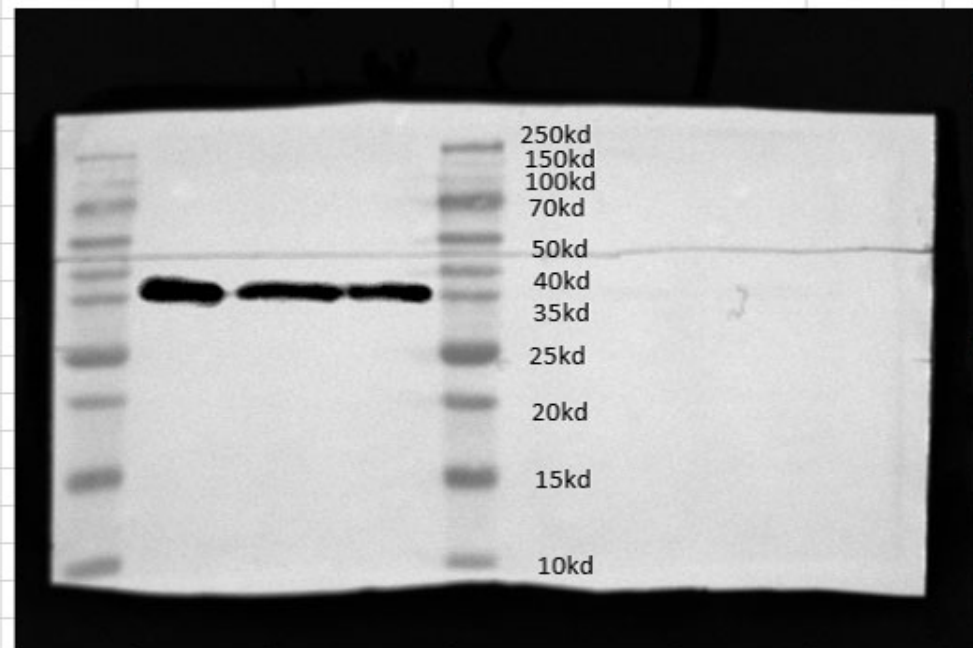

SCX

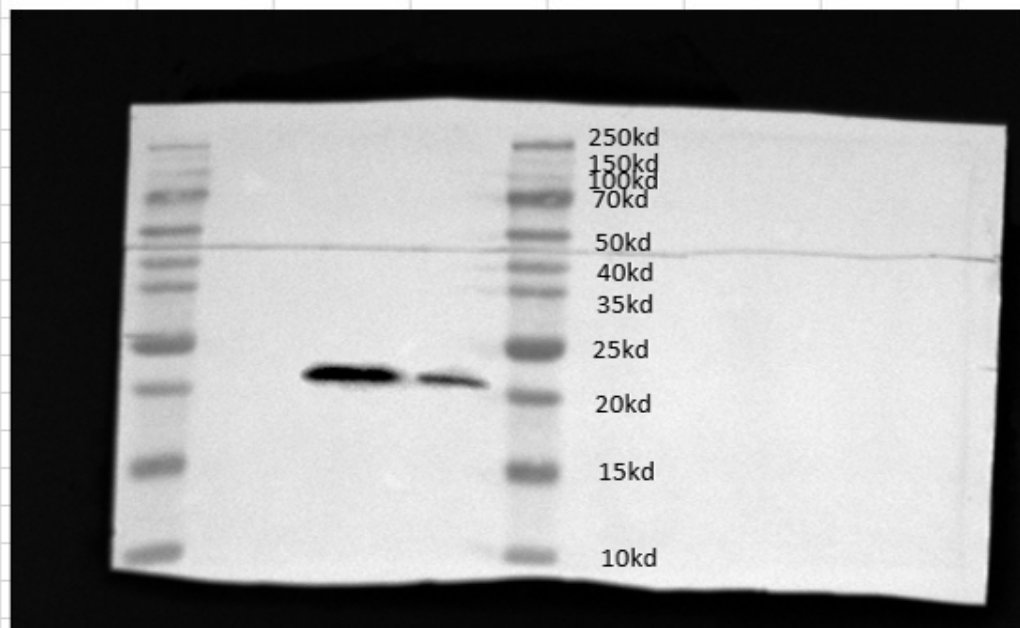

Supplement: fig7-data1 [file elife-98636-fig7-data1-v1.zip]
